# Supplementary material
Source: Springer Nature journal article supplement (https://www.springermedizin.de/resource/supplementary/12885_2013_4169_MOESM3_ESM.pdf/9465630)

**A**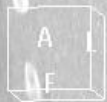**B**

8

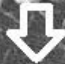

Supplement: MOESM3 [file 9465630]
